# Supplementary material for: In Vitro Activity of Ebselen and Diphenyl Diselenide Alone and in Combination with Drugs against Trichophyton mentagrophytes Strains
Source: MDPI journal article supplement (doi:10.3390/pharmaceutics14061158), 2022-05-28
Supplement: s1 [file s1]

Table S1. Minimal inhibitory concentrations (MIC; µg/ml) and fractional inhibitory concentration index (FICI) of interactions between antifungal agents and organoselenium compounds against clinical isolates of *Trichophyton mentagrophytes* – details

| Isolates | TRB+EBS             |       |       |   | TRB+DPDS            |    |       |   | ITC+EBS             |       |       |   | ITC+DPDS            |    |       |   | EBS+DPDS            |    |      |   |
|----------|---------------------|-------|-------|---|---------------------|----|-------|---|---------------------|-------|-------|---|---------------------|----|-------|---|---------------------|----|------|---|
|          | MIC <sub>comb</sub> |       | FICI  |   | MIC <sub>comb</sub> |    | FICI  |   | MIC <sub>comb</sub> |       | FICI  |   | MIC <sub>comb</sub> |    | FICI  |   | MIC <sub>comb</sub> |    | FICI |   |
| TMH1/20  | 0.004               | 0.016 | 0.532 | I | 0.004               | 2  | 1.062 | I | 0.125               | 0.125 | 1.5   | I | 0.064               | 8  | 0.756 | I | 0.25                | 32 | 2    | I |
| TMH3/20  | 0.004               | 0.008 | 0.532 | I | 0.004               | 8  | 0.75  | I | 0.125               | 0.125 | 1.5   | I | 0.064               | 8  | 0.756 | I | 0.25                | 32 | 2    | I |
| TMH4/20  | 0.004               | 0.016 | 0.532 | I | 0.004               | 2  | 1.25  | I | 2                   | 1     | 12    | A | 0.064               | 4  | 0.756 | I | 0.25                | 8  | 2    | I |
| TMH7/20  | 0.004               | 0.016 | 0.282 | S | 0.004               | 8  | 0.375 | S | 2                   | 2     | 8     | A | 0.125               | 4  | 0.312 | S | 0.5                 | 32 | 1.5  | I |
| TMH8/20  | 0.004               | 0.016 | 0.282 | S | 0.004               | 8  | 0.375 | S | 2                   | 4     | 12    | A | 0.125               | 4  | 0.312 | S | 0.5                 | 32 | 1.5  | I |
| TMH9/20  | 0.004               | 0.032 | 0.756 | I | 0.004               | 8  | 0.75  | I | 1                   | 0.25  | 10    | A | 0.125               | 8  | 1.5   | I | 0.125               | 8  | 1.5  | I |
| TMH10/20 | 0.004               | 0.125 | 0.75  | I | 0.004               | 8  | 0.75  | I | 2                   | 2     | 10    | A | 0.125               | 8  | 0.756 | I | 0.5                 | 32 | 2    | I |
| TMH1/19  | 0.004               | 0.125 | 0.75  | I | 0.004               | 6  | 0.75  | I | 2                   | 2     | 10    | A | 0.064               | 8  | 0.756 | I | 0.5                 | 32 | 3    | I |
| TMH3/19  | 0.008               | 0.064 | 0.756 | I | 0.004               | 4  | 0.5   | I | 0.5                 | 0.5   | 9.81  | A | 0.016               | 4  | 0.756 | I | 0.25                | 8  | 2    | I |
| TMH4/19  | 0.016               | 0.25  | 1     | I | 0.004               | 4  | 0.375 | S | 1                   | 2     | 10    | A | 0.125               | 8  | 1     | I | 0.5                 | 32 | 3    | I |
| TMH5/19  | 0.004               | 0.25  | 0.5   | S | 0.004               | 4  | 0.375 | S | 0.5                 | 1     | 2     | I | 0.125               | 16 | 0.75  | I | 0.5                 | 32 | 3    | I |
| TMH6/19  | 0.004               | 0.032 | 1.032 | I | 0.016               | 64 | 6     | A | 2                   | 4     | 8     | A | 2                   | 64 | 6     | A | 1                   | 32 | 2    | I |
| TMH7/19  | 0.008               | 0.25  | 0.75  | I | 0.016               | 32 | 5     | A | 0.5                 | 4     | 8     | A | 0.032               | 4  | 0.756 | I | 1                   | 16 | 3    | I |
| TMH10/19 | 0.004               | 0.032 | 0.756 | I | 0.004               | 2  | 0.75  | I | 0.5                 | 1     | 10    | A | 0.25                | 8  | 2     | I | 0.25                | 8  | 3    | I |
| TMH11/19 | 0.016               | 0.25  | 0.75  | I | 0.008               | 2  | 0.75  | I | 2                   | 4     | 8     | A | 1                   | 16 | 6     | A | 1                   | 4  | 2    | I |
| TMH12/19 | 0.004               | 0.064 | 1.064 | I | 0.016               | 8  | 6     | A | 2                   | 4     | 8     | A | 1                   | 16 | 6     | A | 0.5                 | 8  | 2.5  | I |
| TMH13/19 | 0.004               | 0.125 | 0.75  | I | 0.004               | 8  | 0.75  | I | 1                   | 4     | 10    | A | 0.25                | 16 | 1     | I | 0.5                 | 32 | 2    | I |
| TMA13/20 | 0.008               | 0.125 | 1     | I | 0.004               | 4  | 0.75  | I | 0.5                 | 0.5   | 9.81  | A | 0.064               | 8  | 2     | I | 0.125               | 16 | 2.5  | I |
| TMA14/20 | 0.08                | 0.032 | 0.506 | I | 0.008               | 4  | 0.75  | I | 0.5                 | 0.25  | 9.81  | A | 0.064               | 4  | 1.5   | I | 0.125               | 16 | 3    | I |
| TMA15/20 | 0.016               | 0.032 | 0.506 | I | 0.008               | 8  | 0.375 | S | 0.125               | 0.125 | 2     | I | 0.064               | 8  | 0.762 | I | 0.125               | 16 | 1.5  | I |
| TMA16/20 | 0.008               | 0.25  | 0.625 | I | 0.008               | 8  | 0.375 | S | 0.25                | 0.5   | 2     | I | 0.125               | 8  | 0.75  | I | 0.5                 | 32 | 2    | I |
| TMA6/19  | 0.008               | 0.125 | 0.75  | I | 0.004               | 2  | 0.75  | I | 0.5                 | 2     | 8     | A | 0.5                 | 8  | 6     | A | 1                   | 8  | 4    | I |
| TMA7/19  | 0.004               | 0.125 | 0.625 | I | 0.004               | 16 | 0.75  | I | 1                   | 8     | 10    | A | 0.25                | 16 | 0.75  | I | 0.5                 | 32 | 1    | I |
| TMA16/19 | 0.032               | 0.5   | 1     | I | 0.016               | 16 | 0.75  | I | 0.5                 | 2     | 9.81  | A | 0.032               | 16 | 0.75  | I | 1                   | 32 | 2    | I |
| TMA1/19  | 0.004               | 0.25  | 0.5   | S | 0.004               | 4  | 0.75  | I | 0.125               | 1     | 2     | I | 0.032               | 4  | 0.756 | I | 0.5                 | 4  | 1    | I |
| TMA28/17 | 0.032               | 2     | 5     | A | 0.008               | 4  | 0.75  | I | 2                   | 2     | 12    | A | 0.032               | 4  | 0.756 | I | 0.5                 | 8  | 2    | I |
| TMA18/19 | 0.008               | 0.5   | 0.75  | I | 0.008               | 4  | 0.75  | I | 0.25                | 4     | 9.81  | A | 0.032               | 8  | 1.5   | I | 2                   | 32 | 3    | I |
| TMA19/19 | 0.016               | 1     | 0.75  | I | 0.008               | 8  | 0.25  | S | 0.5                 | 2     | 2     | I | 0.25                | 16 | 0.75  | I | 1                   | 32 | 1    | I |
| TMA21/17 | 0.004               | 0.25  | 0.75  | I | 0.004               | 2  | 0.75  | I | 0.5                 | 4     | 12    | A | 0.032               | 4  | 0.756 | I | 1                   | 16 | 3    | I |
| TMA31/18 | 0.008               | 0.125 | 0.75  | I | 0.008               | 4  | 0.75  | I | 0.5                 | 2     | 10    | A | 0.064               | 8  | 1.012 | I | 1                   | 16 | 3    | I |
| TMA23/17 | 0.004               | 0.064 | 0.628 | I | 0.004               | 1  | 0.75  | I | 0.5                 | 1     | 9.81  | A | 0.125               | 16 | 5.95  | A | 0.25                | 8  | 2.5  | I |
| TMA24/17 | 0.004               | 0.25  | 0.75  | I | 0.004               | 2  | 0.75  | I | 0.5                 | 4     | 11.81 | A | 0.016               | 4  | 0.756 | I | 2                   | 16 | 4    | I |
| TMA12/19 | 0.016               | 0.25  | 5     | A | 0.008               | 4  | 0.75  | I | 2                   | 0.5   | 12    | A | 1                   | 32 | 6     | A | 0.125               | 16 | 2    | I |

|          |       |       |       |   |       |    |      |   |     |   |      |   |       |    |      |   |      |    |     |   |
|----------|-------|-------|-------|---|-------|----|------|---|-----|---|------|---|-------|----|------|---|------|----|-----|---|
| TMA13/19 | 0.064 | 1     | 5     | A | 0.125 | 64 | 5.9  | A | 2   | 2 | 10   | A | 0.25  | 15 | 0.75 | I | 0.25 | 16 | 2.5 | I |
| TMA25/17 | 0.008 | 0.064 | 0.756 | I | 0.008 | 4  | 0.75 | I | 0.5 | 1 | 8    | A | 0.125 | 8  | 1.5  | I | 0.5  | 16 | 3   | I |
| TMA9/19  | 0.004 | 0.25  | 0.75  | I | 0.016 | 16 | 6    | A | 0.5 | 2 | 9.81 | A | 0.125 | 16 | 5.95 | A | 0.5  | 8  | 2.5 | I |
| TMA10/19 | 0.004 | 0.064 | 0.628 | I | 0.004 | 2  | 0.75 | I | 2   | 1 | 10   | A | 0.125 | 8  | 1.5  | I | 0.5  | 8  | 2   | I |

Notes: I - Indifference, A – Antagonism, S – Synergism, TRB – terbinafine, ITC – itraconazole; EBs – ebselen; DPDS – diphenyl diselenide
